# Supplementary material
Source: PubMed Central journal article supplement (PMC3144128)
Supplement: supp_0022034510388808_JDR388808_Appendix.pdf [file supp_0022034510388808_JDR388808_Appendix.pdf]

## RESEARCH REPORTS

### Biological

B.-Y. Wang<sup>1,2\*</sup>, A. Deutch<sup>3</sup>, J. Hong<sup>2</sup>,  
and H.K. Kuramitsu<sup>2</sup>

<sup>1</sup>Department of Periodontics and Endodontics, <sup>2</sup>Department of Oral Biology,  
<sup>3</sup>School of Dental Medicine, University at Buffalo, State University of New  
York, 3435 Main St., Buffalo, NY 14214, USA; \*corresponding author,  
bwang@buffalo.edu

*J Dent Res* DOI: 10.1177/0022034510388808

# Proteases of an Early Colonizer Can Hinder *Streptococcus mutans* Colonization *in vitro*

## APPENDIX

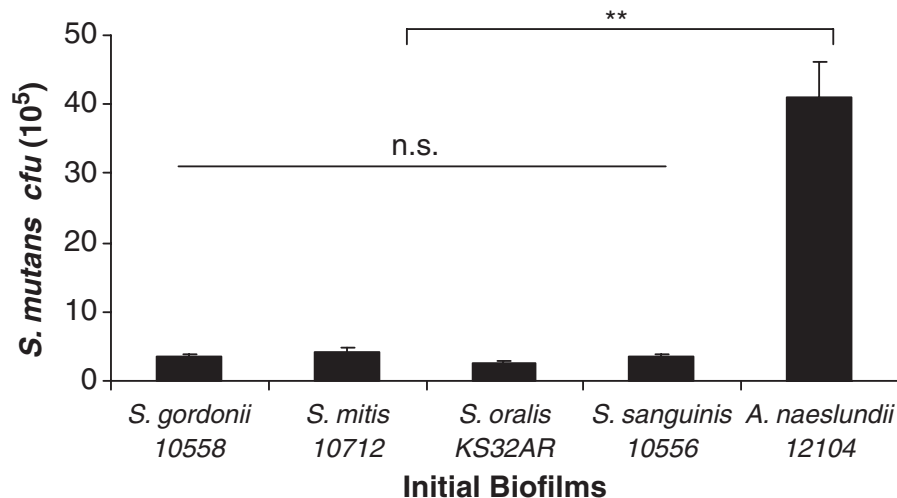

**Appendix Figure.** Colonization of *S. mutans* BM71 on other pre-existing early colonizer biofilms *in vitro*. Initial biofilms of *S. gordonii* 10558, *S. mitis* 10712, *S. oralis* KS32AR, *S. sanguinis* 10556, and *A. naeslundii* 12104 were formed in 48-well polystyrene microtiter plates. *S. mutans* BM71pTet was added on the washed initial biofilms and incubated for another 4 hrs. The sequentially formulated biofilms were disrupted by sonication after the planktonic cells were washed away. The Tet<sup>r</sup> colonies of *S. mutans* BM71pTet were counted on THB agar plates supplemented with tetracycline and adjusted to cfu (10<sup>5</sup>)/well. Data are the mean  $\pm$  standard deviation of triplicate platings from 1 of 3 reproducible experiments. \*\* $p < 0.01$ ; n.s., no significant difference.
